# Supplementary material for: Ultrahigh, ultrafast and large response size visible-near-infrared optical position sensitive detectors based on CIGS structures
Source: Royal Society of Chemistry journal article supplement (doi:10.1039/c7tc01462g), 2017-01-01
Supplement: c7tc01462g1.pdf [file c7tc01462g1.pdf]

## Supporting Information

### Ultrahigh, ultrafast and large response size visible-near-infrared optical position sensitive detector based on CIGS structure

Shuang Qiao, Kaiyu Feng, Zhiqiang Li<sup>†</sup>, Guangsheng Fu, Shufang Wang<sup>†</sup>

*Hebei Key Laboratory of Optic-Electronic Information and Materials, College of  
Physics Science and Technology, Hebei University, Baoding 071002, P. R. China.*

<sup>†</sup>Corresponding authors: [lizhiqiang@hbu.edu.cn](mailto:lizhiqiang@hbu.edu.cn), and [sfwang@hbu.edu.cn](mailto:sfwang@hbu.edu.cn)

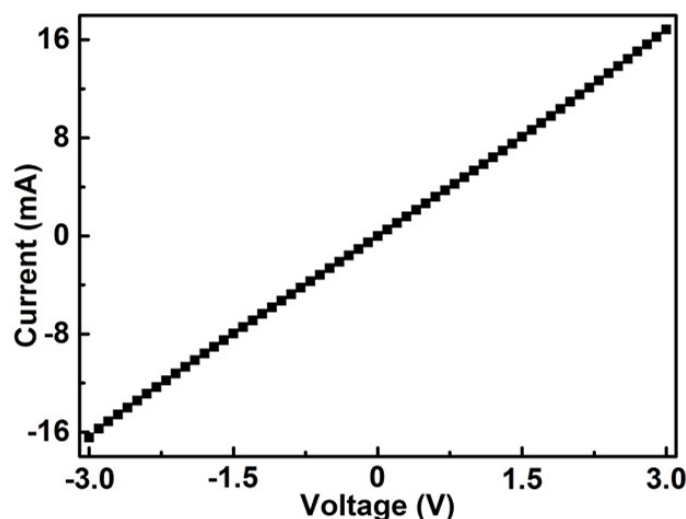

**Figure S1.** The transverse I-V curve in the dark.

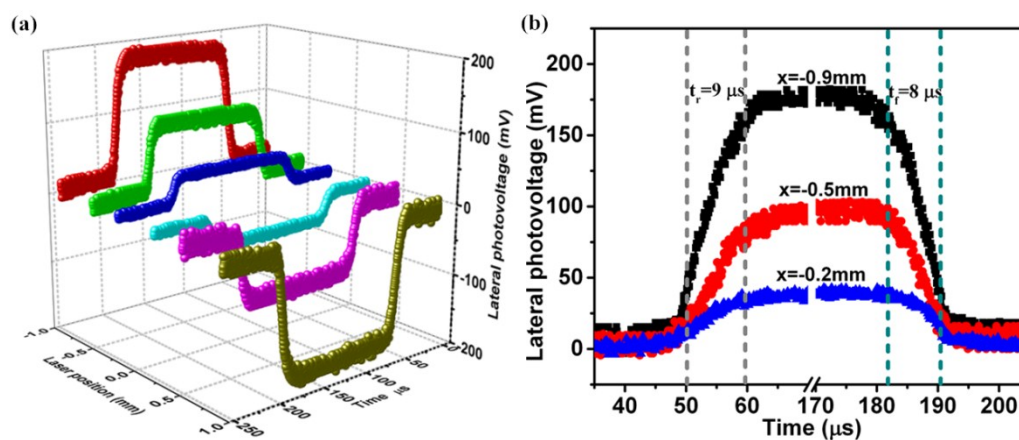

**Figure S2.** (a) Time-dependent lateral photovoltages to pulsed visible laser irradiation

(532 nm laser) at six different laser positions with a frequency of 4000 Hz. (b) shows the enlarged rise and fall edges of the lateral photovoltage curve at three different positions.

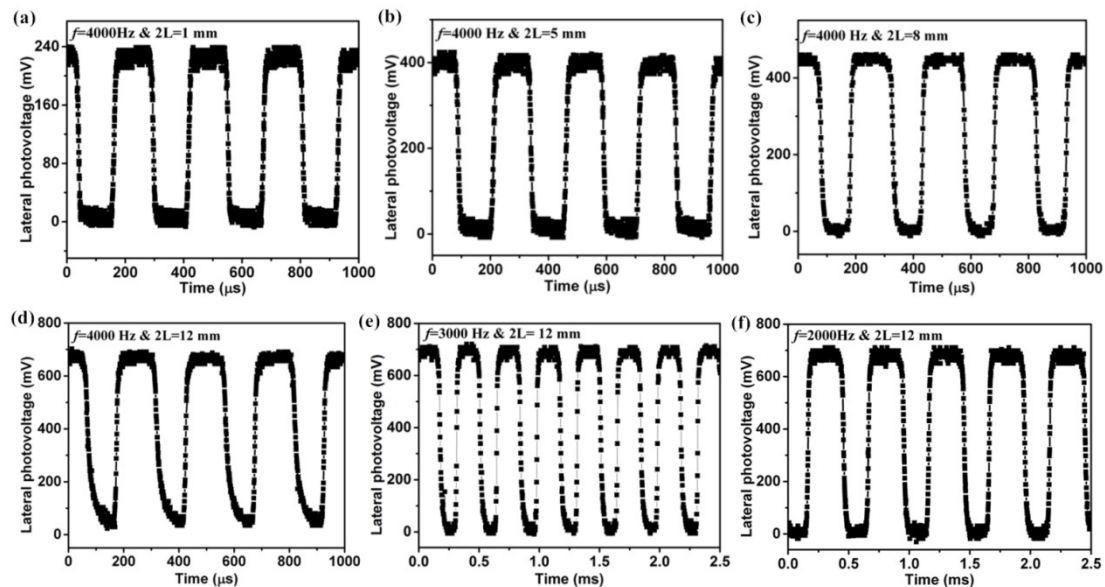

**Figure S3.** Time-dependent lateral photovoltages of the Glass/Mo/CIGS/CdS/ZnO/ITO structure to pulsed visible laser irradiation (532 nm laser) with a frequency of 4000 Hz under contact distance of (a) 1 mm, (b) 5 mm, (c) 8 mm, and (d) 12 mm, respectively. Time-dependent lateral photovoltages to pulsed visible laser irradiation (532 nm laser) under contact distance of 12 mm, with a frequency of (e) 3000 Hz, and (f) 2000 Hz, respectively.
